# Supplementary material for: Identification and Protective Efficacy of Eimeria tenella Rhoptry Kinase Family Protein 17
Source: MDPI journal article supplement (doi:10.3390/ani12050556), 2022-02-23
Supplement: s1 [file s1]

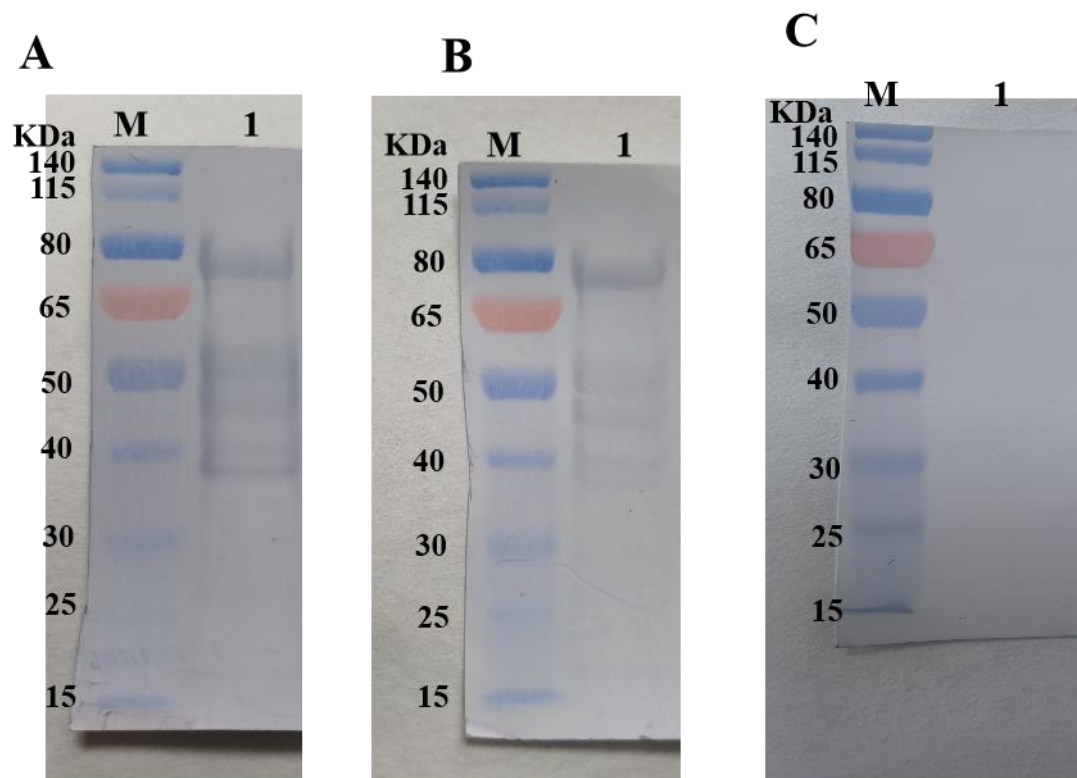

**Figure S1.** Original Western blot figures of Figure 2. (A) rEtROP17 was probed with mouse anti-His tag monoclonal antibody. (B) rEtROP17 was probed with chicken anti-*E. tenella* serum. (C) rEtROP17 was probed with normal chicken serum.

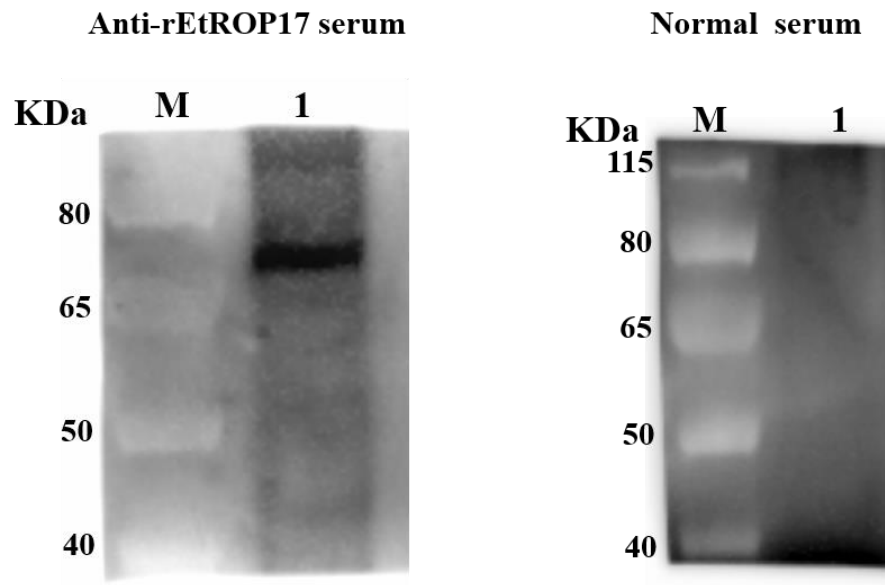

**Figure S2.** Original Western blot figures of Figure 3. Western blot analysis of protein extracts of merozoites, using mouse anti-rEtROP17 serum and normal mouse serum, respectively.
